# Supplementary material for: Comparative study of gut microbiota on fat deposition in European meat pigeons and Yuzhong pigeons
Source: PeerJ. 2025 Sep 9;13:e20008. doi: 10.7717/peerj.20008 (PMC12428521; doi:10.7717/peerj.20008)
Supplement: Supplemental Information 1 [file peerj-13-20008-s001.xlsx]

## Sheet: fig1
									weight/g
			European meat pigeon									Yuzhong pigeon
		Time/d	E1	E2	E3	E4	average	error				Y1	Y2	Y3	Y4	average	error
		1	19.2	17.4	18.7	16.4	17.925	1.26853				17.8	14.4	16.9	20.3	17.35	2.43653
		3	55.6	60.3	57.6	56.6	57.525	2.02217				44.7	38.1	45.8	41.2	42.45	3.50095
		5	116.8	106.8	105.4	107.3	109.075	5.21241				101.9	88.6	77.3	78.6	86.6	11.381
		7	161.7	149.1	155.8	142.4	152.25	8.34366				140.8	111.8	102.7	98.4	113.425	19.0858
		9	232.6	206.3	210.6	211.6	215.275	11.7766				169.9	148.7	120.66	146.2	146.365	20.167
		11	263.4	250.8	230.1	260.9	251.3	15.1466				206.3	159.2	203.1	177.1	186.425	22.3698
		14	308.4	300.6	279.4	292.6	295.25	12.38				245.1	241.2	196.3	211.1	223.425	23.618
		17	397.6	385.5	360.5	381.6	381.3	15.4495				287.6	287.4	244.8	251.8	267.9	22.812
		21	465.5	475.5	481.3	503.6	481.475	16.1291				364.7	355.1	299.7	316.9	334.1	30.8575
		25	551.4	521.6	510.6	479.8	515.85	29.5749				400.2	331.3	350.1	365.7	361.825	29.1942
		28	560.7	560.3	479.1	521.8	530.475	38.806				422.4	387.2	354.4	357.5	380.375	31.6788
									weight of abdominal fat/g
			European meat pigeon									Yuzhong pigeon
		Time/d	E1	E2	E3	E4	average	error				Y1	Y2	Y3	Y4	average	error
		14	1.799	2.167	2.346	2.345	2.16425	0.257629				1.312	0.865	0.985	0.774	0.984	0.235121
		21	4.186	3.669	3.818	2.879	3.638	0.55068				2.517	2.011	1.885	1.467	1.97	0.432483
		28	5.196	6.223	5.151	4.276	5.2115	0.796282				3.113	2.495	1.795	2.454	2.46425	0.538462
									concentration of TG in stool/mg/g
			European meat pigeon									Yuzhong pigeon
		Time/d	E1	E2	E3	E4	average	error				Y1	Y2	Y3	Y4	average	error
		21	0.799	0.741	0.943	0.976	0.86475	0.112749				1.446	1.494	1.185	1.277	1.3505	0.144343
		28	0.731	0.787	0.621	0.728	0.71675	0.0693608				1.289	1.165	1.173	1.152	1.19475	0.0634265

## Sheet: fig3
									concentration of bile acid in small intestine/µmol/g
			European meat pigeon									Yuzhong pigeon
		Time/d	E1	E2	E3	E4	average	error				Y1	Y2	Y3	Y4	average	error
		21	7.745	7.022	6.767	7.038	7.143	0.420098				12.26	11.24	10.67	10.37	11.135	0.832286
		28	7.986	6.946	7.499	7.643	7.5185	0.432895				10.97	11.67	12.85	11.49	11.745	0.794208
									concentration of bile acid instool/µmol/g
			European meat pigeon									Yuzhong pigeon
		Time/d	E1	E2	E3	E4	average	error				Y1	Y2	Y3	Y4	average	error
		21	6.54	5.78	5.96	5.24	5.88	0.53591				7.08	7.16	8.17	6.56	7.2425	0.673121
		28	6.65	6.09	6.03	5.76	6.1325	0.373664				8.57	8.01	7.84	7.33	7.9375	0.511167
									concentration of TG in small intestine/mg/g
			European meat pigeon									Yuzhong pigeon
		Time/d	E1	E2	E3	E4	average	error				Y1	Y2	Y3	Y4	average	error
		21	2.183	1.785	1.743	1.575	1.8215	0.257513				1.048	1.245	0.797	1.022	1.028	0.183381
		28	1.653	2.145	1.343	1.477	1.6545	0.350776				1.284	1.133	0.665	0.957	1.00975	0.265856

## Sheet: fig4
			European meat pigeon									Yuzhong pigeon
		enzyme	E1	E2	E3	E4	average	error				Y1	Y2	Y3	Y4	average	error
		FAS/U/g	40.44	46.67	40.38	39.79	41.82	3.24661				22.87	19.91	17.66	18.83	19.8175	2.23281
		LPL/U/g	13.38	11.06	13.65	16.23	13.58	2.11485				4.45	4.01	5.89	4.53	4.72	0.812814
		HSL/U/g	58.93	64.29	57.86	53.31	58.5975	4.50987				35.98	41.38	33.22	35.89	36.6175	3.42345
		ACC/U/g	0.838	0.915	0.887	1.033	0.91825	0.0828548				0.429	0.411	0.415	0.443	0.4245	0.0145488

## Sheet: fig 5
									concentration ofLDL-c/mmol/L
		Time/d							European meat pigeon	error								Yuzhong pigeon	error
		21	1.531	1.321	1.128	1.367	1.33675	0.165804	1.34	0.16		1.078	1.012	1.022	1.063	1.04375	0.031753	1.04	0.08
		28	1.537	1.051	1.175	1.163	1.2315	0.211183	1.23	0.19		0.986	0.773	1.131	0.998	0.972	0.148047	0.97	0.11
									concentration of glucose/mmol/L
		Time/d							European meat pigeon	error								Yuzhong pigeon	error
		21	12.03	11.51	15.23	11.77	12.635	1.74298	12.6	1.38		13.11	12.97	10.86	14.13	12.7675	1.37274	12.8	1.66
		28	14.32	14.34	12.82	11.59	13.2675	1.32568	13.3	1.57		12.56	10.24	12.97	13.86	12.4075	1.54353	12.4	1.71
									concentration of insulin/U/ml
			European meat pigeon									Yuzhong pigeon
		Time/d	E1	E2	E3	E4	average	error				Y1	Y2	Y3	Y4	average	error
		21	21.73	20.01	19.11	18.81	19.915	1.31305				19.821	16.263	16.649	16.318	17.2628	1.714
		28	19.11	22.02	18.33	18.18	19.41	1.78712				19.65	16.53	17.56	16.51	17.5625	1.47552
									concentration of glucagon/pg/ml
			European meat pigeon									Yuzhong pigeon
		Time/d	E1	E2	E3	E4	average	error				Y1	Y2	Y3	Y4	average	error
		21	68.38	70.15	61.57	60.96	65.265	4.68161				36.458	40.463	35.638	36.483	37.2605	2.17079
		28	69.46	70.88	63.13	70.27	68.435	3.58417				41.28	36.11	40.34	41.32	39.7625	2.47675
									concentration of TG/mmol/L
			European meat pigeon									Yuzhong pigeon
		Time/d	E1	E2	E3	E4	average	error				Y1	Y2	Y3	Y4	average	error
		21	1.764	2.033	1.808	1.767	1.843	0.128247				1.296	1.072	1.033	1.117	1.1295	0.116185
		28	1.931	1.879	1.522	1.803	1.78375	0.182244				1.347	1.881	0.733	0.929	1.2225	0.508224
									concentration of biotin/pmol/L
			European meat pigeon									Yuzhong pigeon
		Time/d	E1	E2	E3	E4	average	error				Y1	Y2	Y3	Y4	average	error
		21	3.371	3.599	2.897	3.161	3.257	0.299319				1.895	2.103	1.371	2.558	1.98175	0.492377
		28	3.622	3.381	3.212	3.427	3.4105	0.168599				2.306	2.815	1.734	1.601	2.114	0.55852

## Sheet: fig6
				concentration of SCFAs/mg/g
				1	2	3	4	average	error
			European meat pigeon	40.53	32.69	36.88	37.54	36.91	3.23061
			Yuzhong pigeon	18.99	17.31	22.53	15.83	18.665	2.88196
				concentration of soluble sugar/mg/g
				1	2	3	4	average	error
			European meat pigeon	46.37	51.96	43.88	40.35	45.64	4.88389
			Yuzhong pigeon	36.21	37.13	39.32	36.17	37.2075	1.47649
				concentration of bile acid/µmol/g
				1	2	3	4	average	error
			European meat pigeon	9.07	8.44	9.81	8.33	8.9125	0.68139
			Yuzhong pigeon	12.73	14.22	12.97	14.48	13.6	0.87799
